# Supplementary material for: Manganese/iron-based nanoprobes for photodynamic/chemotherapy combination therapy of tumor guided by multimodal imaging
Source: Royal Society of Chemistry journal article supplement (doi:10.1039/d0nr08831e), 2021-01-01
Supplement: d0nr08831e1.pdf [file d0nr08831e1.pdf]

## Supporting Information

Manganese/iron-based nanoprobes for photodynamic/chemotherapy  
combination therapy of tumor guided by multimodal imaging

Shanshan Fan, Yu Zhang, Haisong Tan, Cuili Xue, Yiqian Zha, Jiaqi Niu, Yanlei Liu,  
Yingsheng Cheng, Daxiang Cui.

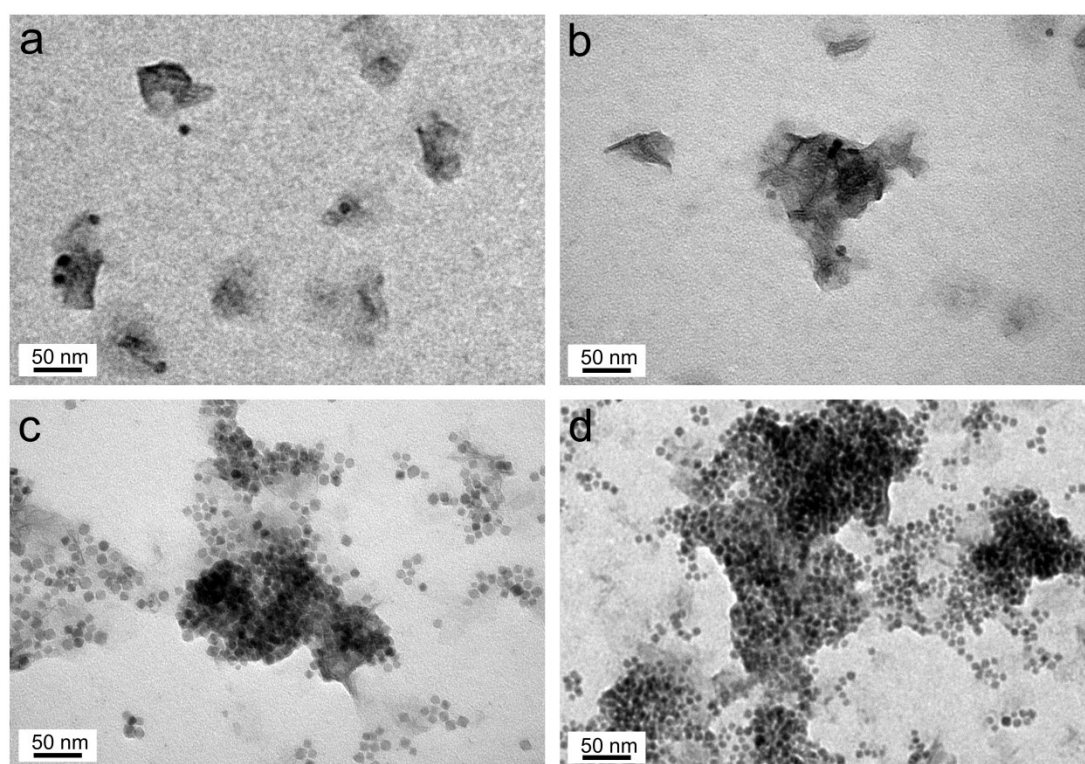

**Fig.S1** (a-b) TEM images of Fe<sub>3</sub>O<sub>4</sub>@MnO<sub>2</sub> synthesized with 5uL Fe<sub>3</sub>O<sub>4</sub> NPs; (c-d) TEM images of Fe<sub>3</sub>O<sub>4</sub>@MnO<sub>2</sub> synthesized with 20uL Fe<sub>3</sub>O<sub>4</sub> NPs.

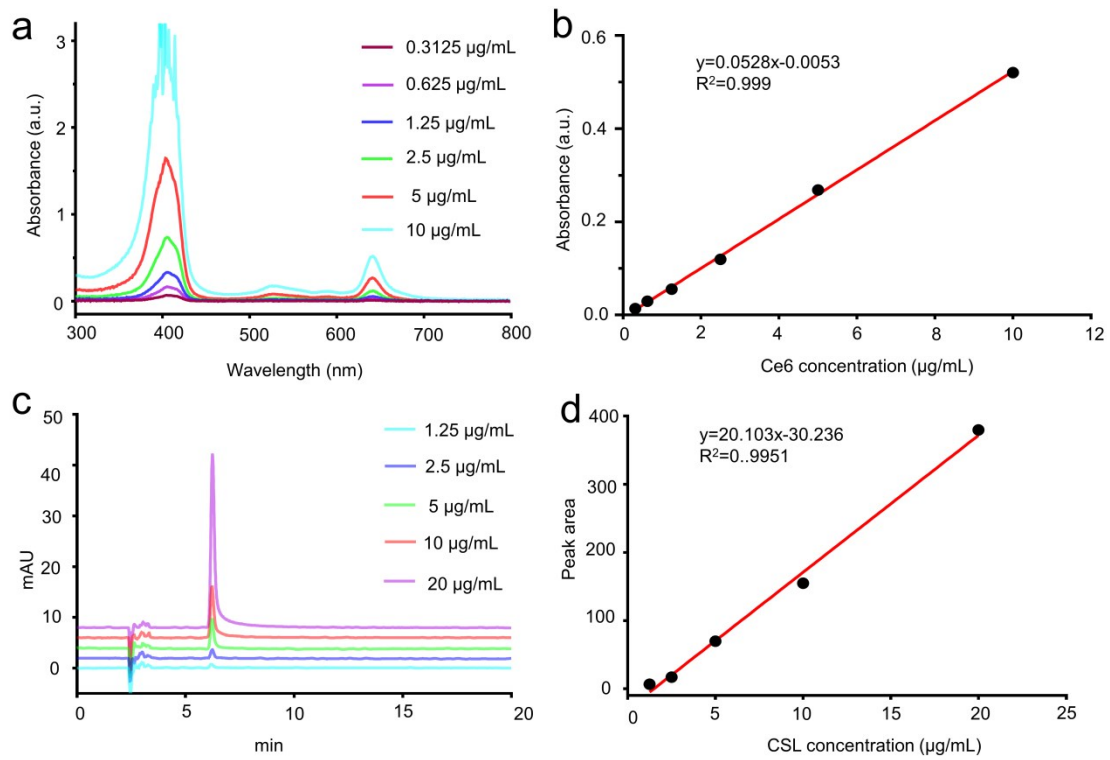

**Fig.S2** (a-b) UV-vis absorption of Ce6 with different concentrations and the calibration cure of Ce6. (c-d) HPLC of CSL with different concentrations and the calibration cure of CSL.

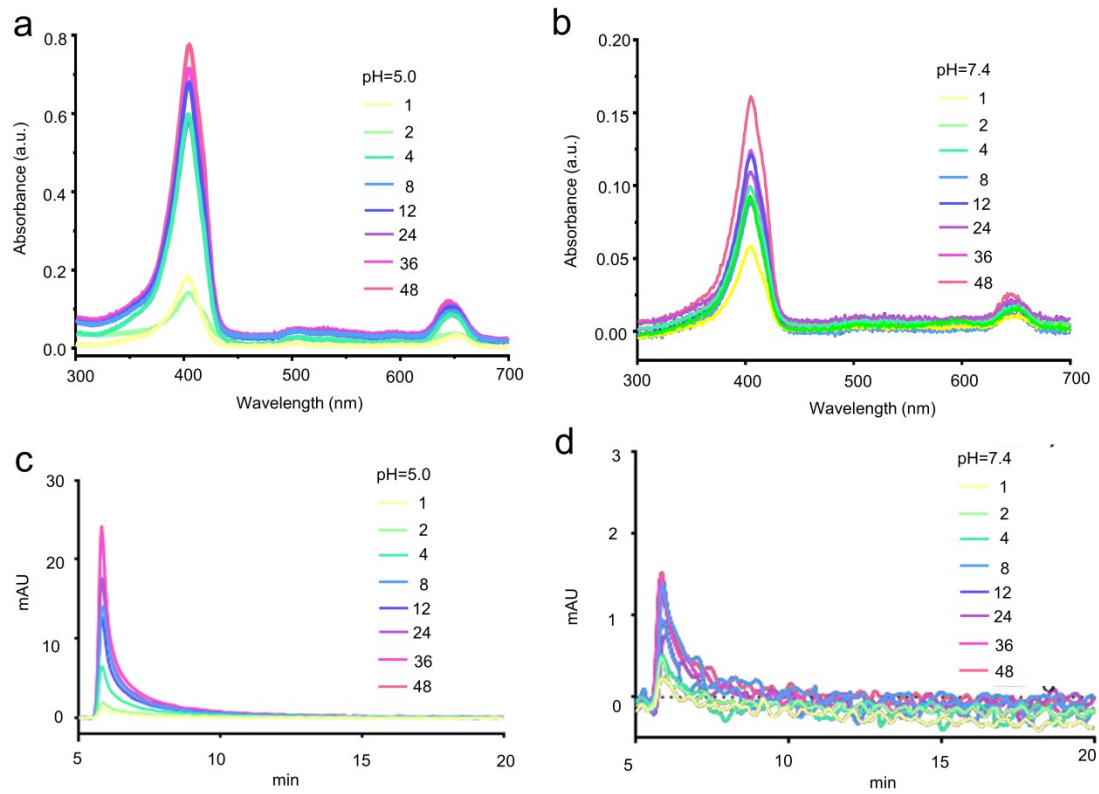

**Fig.S3** (a-b) UV-vis absorption of Ce6 released by nanoplateforms in various PBS (pH=5.0 and 7.4) solution at different points in time. (c-d) HPLC of CSL released by nanoplateforms in various PBS (pH=5.0 and 7.4) solution at different points in time.

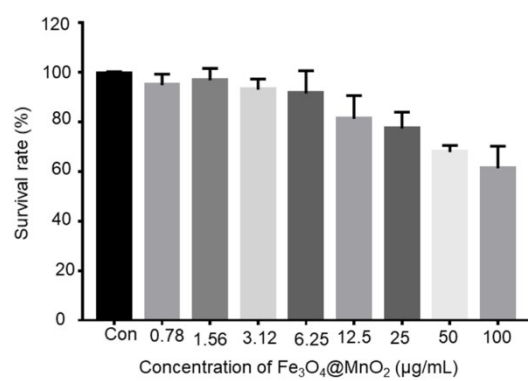

**Fig.S4** Cell viability of Bel-7402 cells treated with various concentrations of Fe<sub>3</sub>O<sub>4</sub>@MnO<sub>2</sub> nanoplateforms for 24h in the dark, respectively.

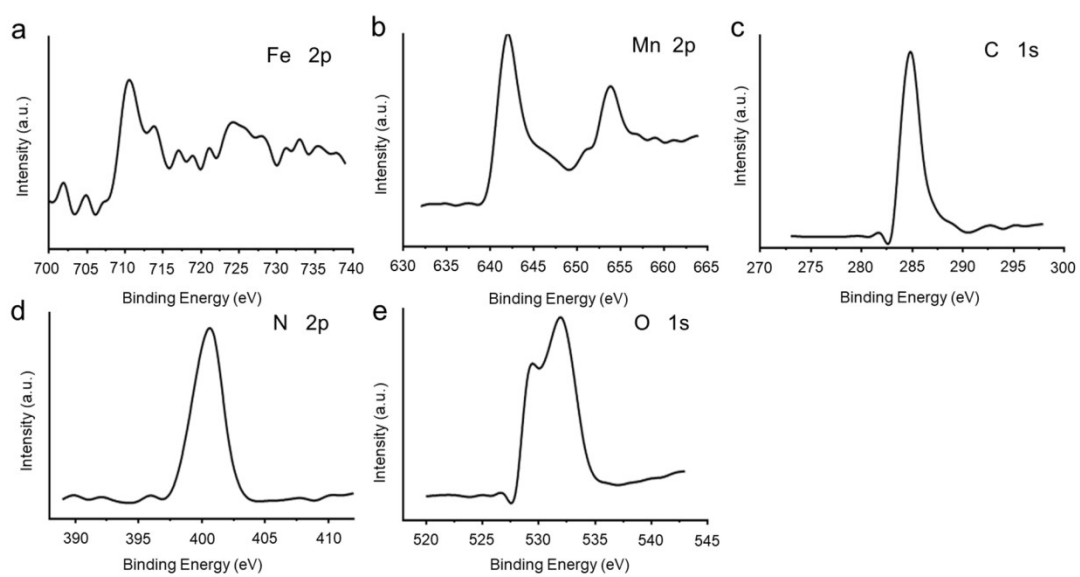

**Fig.S5** XPS spectrum of Fe<sub>3</sub>O<sub>4</sub>@MnO<sub>2</sub> nanoplateforms: (a) Fe, (b) Mn, (c) C, (d) N, (e) O elements, together with their binding energy curves.

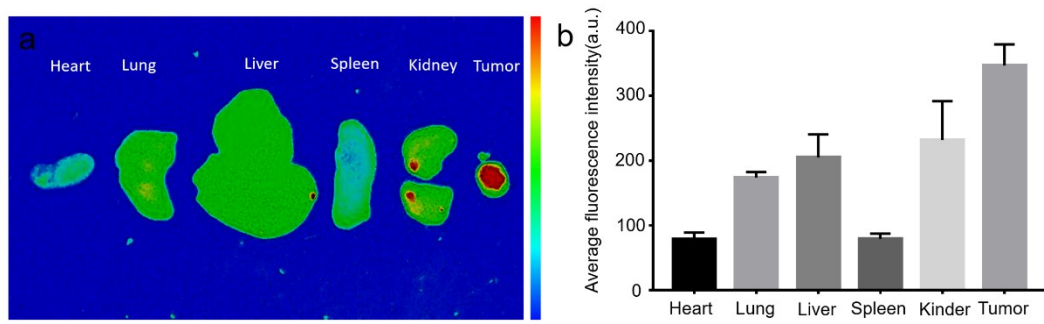

**Fig.S6** (a) Ex vivo fluorescence images of major organs and tissue dissected from mice at 24 h post-injection. (b) Quantitative analysis of the fluorescence signals.

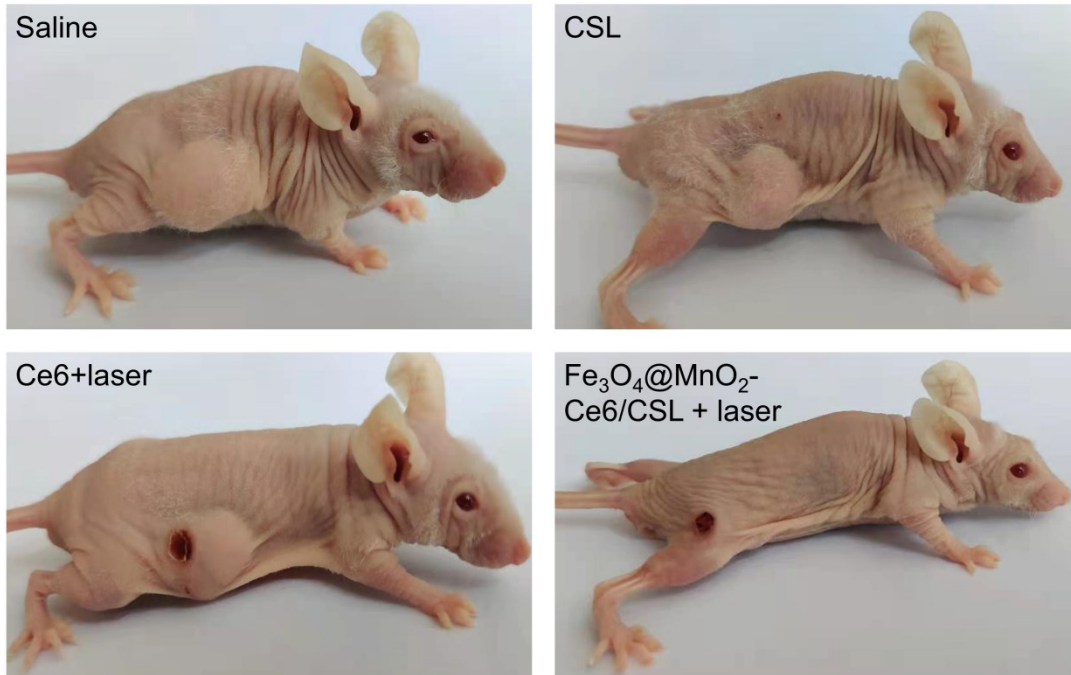

**Fig.S7** Photographs of tumor-bearing mice in each group after treatment.

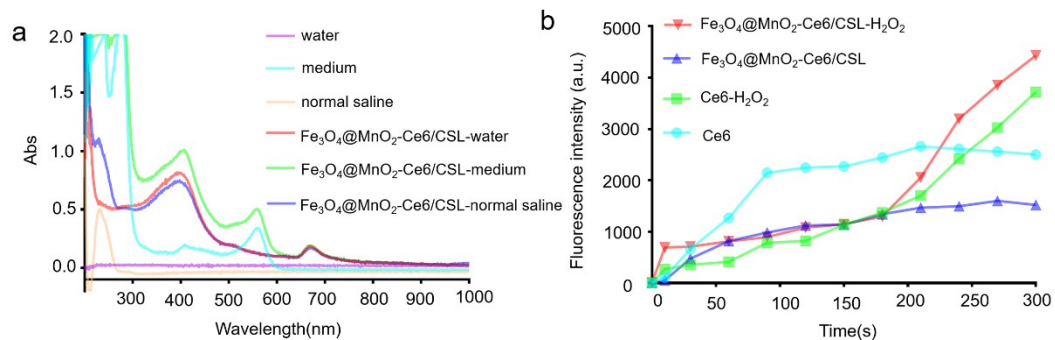

**Fig.S8** (a) UV-Vis absorption spectra of water, medium, normal saline and UV-Vis absorption spectra of Fe<sub>3</sub>O<sub>4</sub>@MnO<sub>2</sub>-Ce6/CSL in water, saline and medium. (b) SOSG fluorescence for determination of <sup>1</sup>O<sub>2</sub> generation of free Ce6 and Fe<sub>3</sub>O<sub>4</sub>@MnO<sub>2</sub>-Ce6/CSL under laser irradiation.
